# Supplementary material
Source: PubMed Central journal article supplement (PMC2587154)

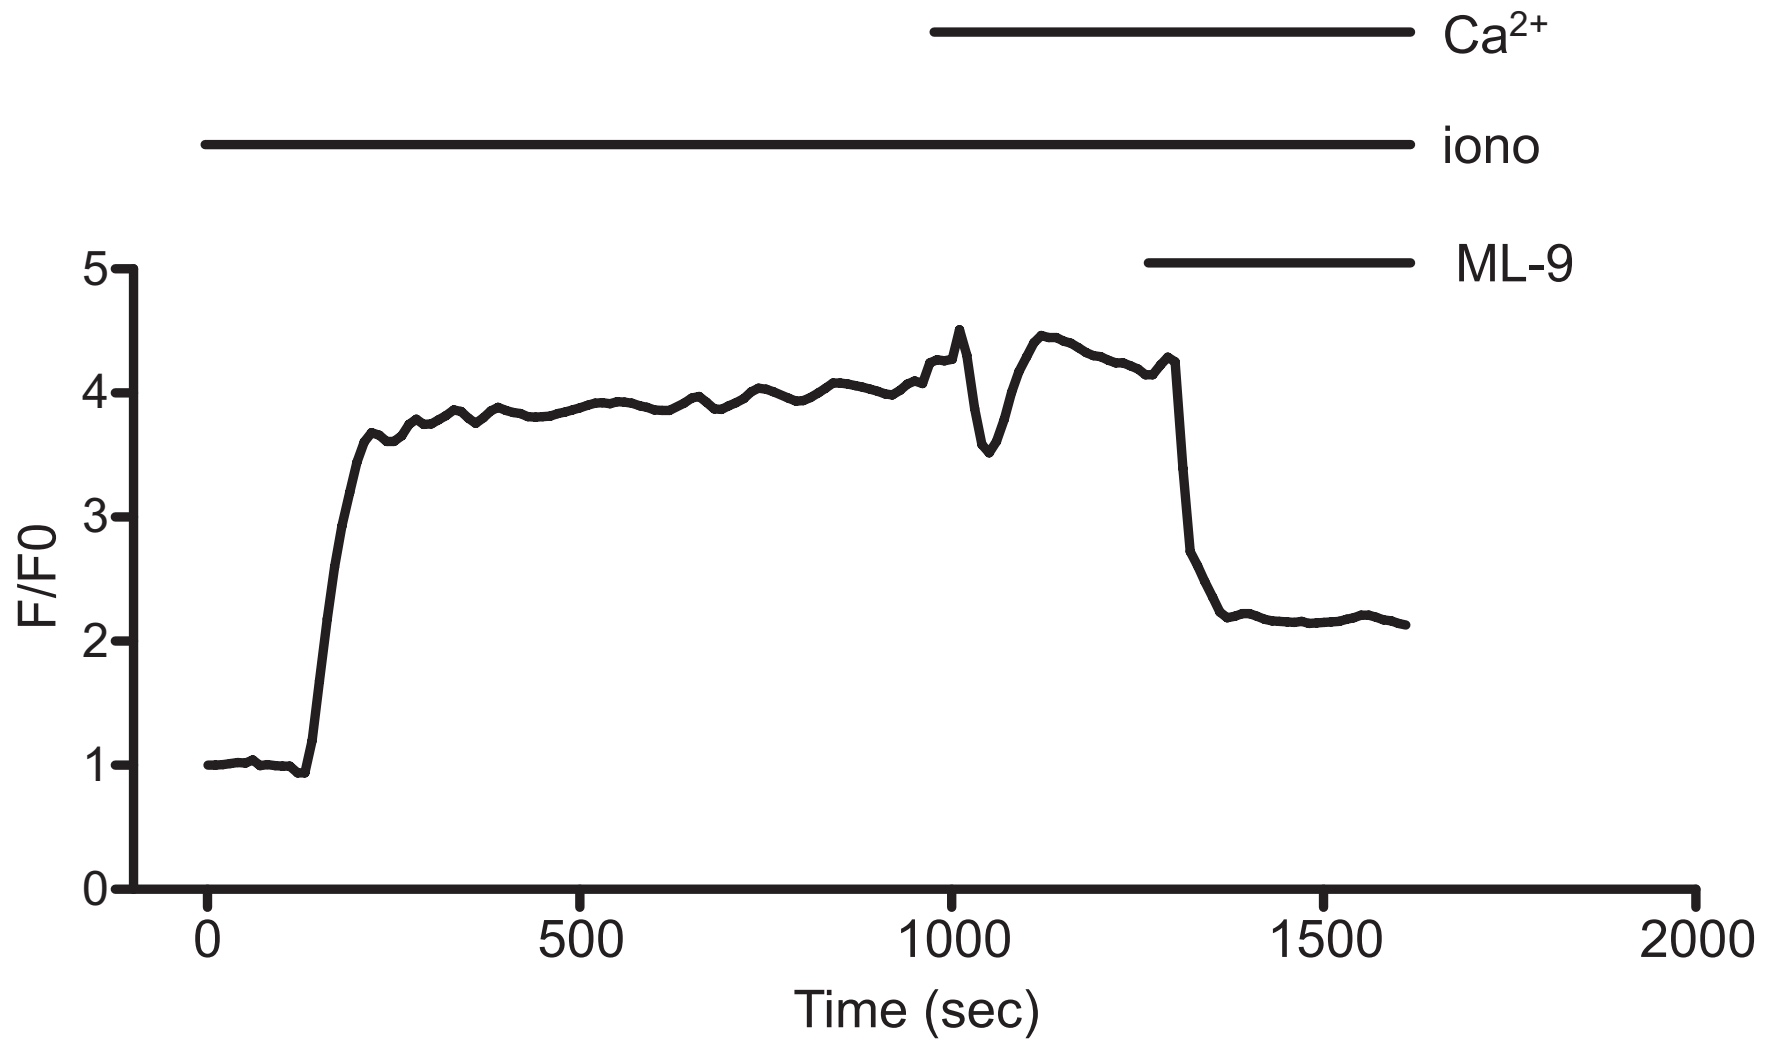

Supplemental Figure 2

Supplement: NIHMS44567-supplement-Sup_figs.pdf [file NIHMS44567-supplement-Sup_figs.pdf]
